# Supplementary material for: An Automated Technique for Damage Mapping after Earthquakes by Detecting Changes between High-Resolution Images
Source: Copernicus journal article supplement (doi:10.5194/nhess-2018-73), 2018-04-10
Supplement: Supplementary file [file nhess-2018-73-RC2-supplement.pdf]

This paper works on the earthquake damage assessment from the pre and post event optical imagery, with the purpose of proposing an automatic and efficient method for quick damage mapping. However, this article is very weak in terms of the innovativeness of the method, the logical rigor of the argument, the clarity of the description, and the usefulness of the discussions. The details are as follows;

(1) The title of this article is “Automated Technique for Damage Mapping after Earthquakes by Detecting Changes between High-Resolution Images”, this title does not provide as original information of the article, because damage mapping from the pre and post event optical image using the change detection method is very basic and old method in this field. One of the keywords of the title is automated technique, unfortunately, I didn’t find any demonstration in your paper regarding the degree of automation, did you implemented your method in software or you provide a Pipeline platform for running your method?

(2) Regarding the abstract, the keywords of the abstract are improving the speed and accuracy, unfortunately, this was also not reflected in the manuscript. In terms of speed, how can you say its high speed? What exactly the time you need to perform the post-event damage assessment? How can you say your method is faster than the others? In terms of the accuracy, an overall accuracy of about 60% for block scale damage assessment is too low, especially for the high-resolution optical image? How can the author say it is high accuracy? Therefore the abstract is not consistent with the contents of your manuscript.

(3) The introduction part only give the very basic summary of the previous traditional research, I didn’t see the trends and progress of the state of art research in using the optical high-resolution image for damage mapping, the description of the introduction does not provide valuable information for me. In the final part of the introduction, the author mentioned that “The method is applicable to a variety of data sources and sensors”, this description is too general, the author also mentioned that rapidly near real time, unfortunately, it is not reflected in the manuscript.

(4) In the related work, the author does not summarize the progress and trends in this field, for example, what are exactly the problems and challenging? What are the trends? How does the previous work inspire you to conduct this research? What's new in your research? The author needs to rewrite this part and the introduction part.

(5) In the study area and dataset part, what is the reason you use high-resolution airborne data, because for me the damage mapping from the high-resolution airborne image is easy, it is quite easy for me to see the difference in Figure 2 visually. What is the purpose of using two cases for comparison? What is the ground truth data for the damage buildings? How many damage levels of the ground truth data? Where did you obtain the ground truth data? The acquired time in line 120 is not consistent with the Table 1, please correct it. In addition, it will better to provide the geographic information in the map of the study areas? Why did you choose this area for research? Are there any other affected areas that covered by the optical image?

(6) The organization of part3 is unclear for me, In my personal understanding, Structural Similarity Index and Gradient Similarity Index are the previous methods, based on the previous method, your proposed Improved Gradient Similarity Index and applied this method to perform the damage mapping. However, it is quite difficult for me to know what is the inspiration for the author to propose this modification, how this modification can bring effect for damage mapping? What is the theoretical basis for this modification? Why is it important?

(7) Part 4 focus on Rapid Mapping, unfortunately, I did not see the mapping result, the processing step in the figure8 is quite basic, the author did not provide the details of the processing parameters, for example, what size is the block scale? Why you chose this scale? The author mentioned that "As object-based analysis methods generally outperform pixel-based methods", I think the author should give the reference? The author also mentioned that "buildings, pavements (e.g., roads and parking lots),

vegetation, and shadows, which were apparently not collapsed buildings, were extracted using pre-event imagery and masked”, my question is if the difference between intact buildings is apparently with the collapsed buildings, then what is the significance of your research? .

(8) Part 4.2 mentioned that “The simple assumption made in this study was that if a building was damaged, then its post-event height would change and the gradient similarity index between pre- and post-events would be less than the undamaged building”, this assumption does not make sense for me.

(9) The DAR is proposed by the other researcher, please cite the publication, as there is no information about your ground truth data, it is difficult for me to know what is the damaged block.

(10) In part 5, where is the mapping? How can we know it is rapid or not? Why did you say it is high accuracy?
